# Supplementary material
Source: PubMed Central journal article supplement (PMC3162435)

**Fig. S1**

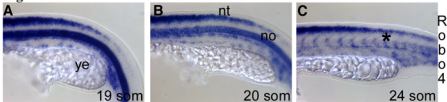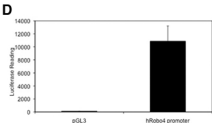

**E** (A/T)(A/T)CAA(A/T)G Sox TF DNA Binding Sequence  
AACAAAG Sox18 TF DNA Binding Sequence  
-1170-1176 bp on Human Robo4 promoter  
-1399-1405 bp on Mouse Robo4 promoter

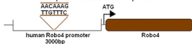

WT hRobo4 Promoter: AACAAAG  
Point Mutant 1 (PM1): AATAAAG  
Point Mutant 2 (PM2): AACTAAG  
Point Mutant 3 (PM3): AACAGAG  
Point Mutant 4 (PM4): AATTGAG

# Fig. S2

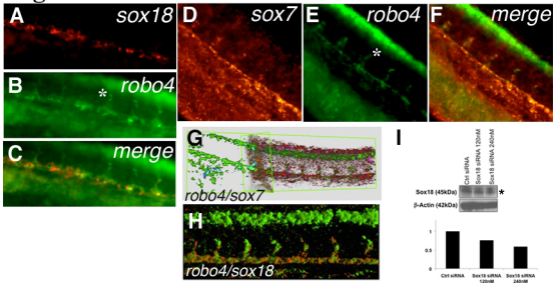

# Fig. S3

## A

Putative Sox18 binding site (A/T)(A/T)CAA(A/T)G  
 AACAAAG  
 AACAAAT

Wild Type Probe:

CAG AGA AGC TGG CCA GGA ACA ATT GGG AAC AAA GGC TGG ATA CTC TTC CG

Mutant Probe 1:

CAÇ AGA AGC TGG CCA GGA ACA ATT GGG AAT TGA GGC TGG ATA CTC TTC CG

Mutant Probe 2:

CAÇ AGA AGC TGG CCA GGA ATT GAC GGG AAT TGA GGC TGG ATA CTC TTC CG

## B

Ratio of  
 Labeled: Unlabeled

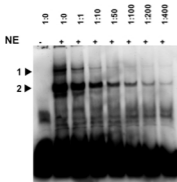

## C

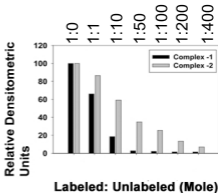

## D

*Robo4* and *Robo1* relative mRNA levels after *sox18* and *sox7* double knockdown

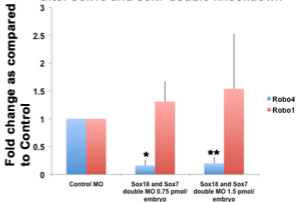

**Fig. S4**

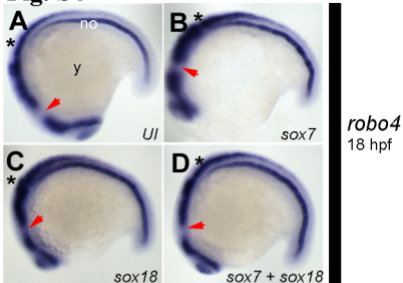

**E**

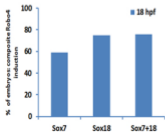

**F**

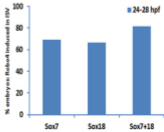

Supplement: supp_M111.220665_jbc.M111.220665-1.pdf [file supp_M111.220665_jbc.M111.220665-1.pdf]
